# Supplementary material for: Improved conversion of bamboo shoot shells to furfuryl alcohol and furfurylamine by a sequential catalysis with sulfonated graphite and biocatalysts
Source: Royal Society of Chemistry journal article supplement (doi:10.1039/d0ra07372e), 2020-01-01
Supplement: d0ra07372e1.pdf [file d0ra07372e1.pdf]

## Support Information

### Figure Captions

**Fig. S1.** XPS spectra of Sn on Sn-graphite.

**Fig. S2.** Recovery and reuse of Sn-graphite for catalyzing BSS.

**Fig. S3.** Effects of cosubstrate glucose loading on FF-reducing activity of CCZU-A13 cells.

**Fig. S4.** Effects of various temperature on FF-reducing on activity of CCZU-A13 cells (a); Effects of various pH on FF-reducing catalytic activity of CCZU-A13 cells (b).

**Fig. S5.** Effects of amine donor IPA loading on the bioamination activity of AT2018 cells.

**Fig. S6.** Effects of various temperature on FF-amination activity of AT2018 cells (a); Effects of various pH on FF-amination activity of AT2018 cells (b).

### Table Caption

**Table S1.** Changes of Sn content on Sn-graphite by element analysis before and after repeated use of Sn-graphite

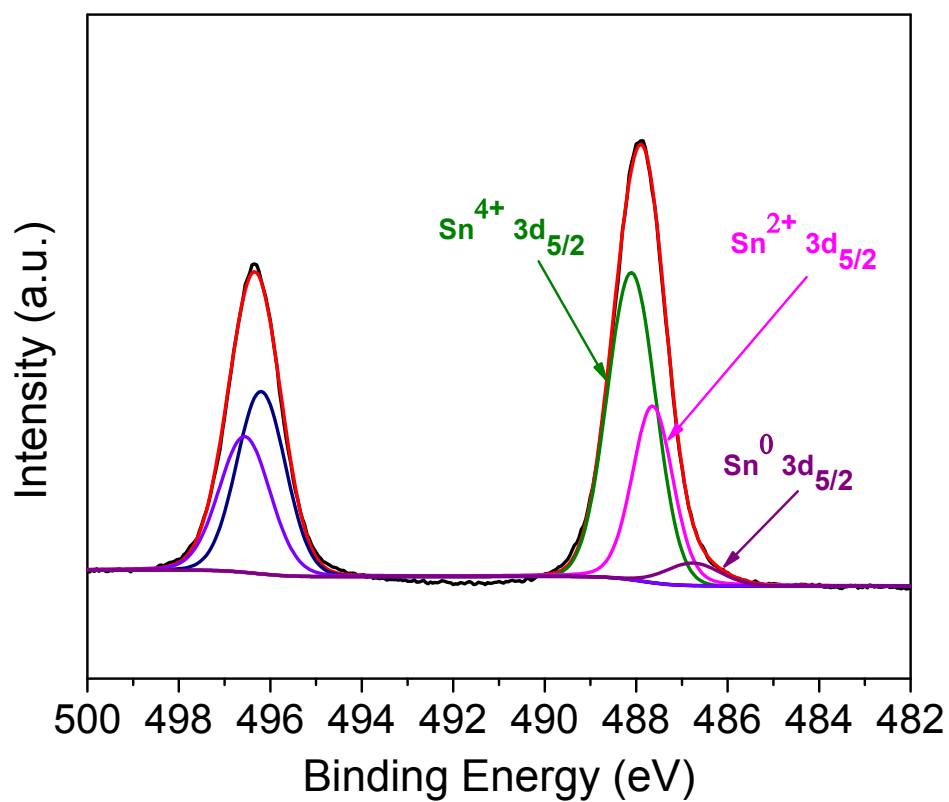

| Name                               | Peak BE | FWHM (eV) | Area (P) CPS.eV | Fraction (%) |
|------------------------------------|---------|-----------|-----------------|--------------|
| Sn <sup>0</sup> 3d <sub>5/2</sub>  | 486.76  | 1.40      | 3052.253        | 5.2          |
| Sn <sup>2+</sup> 3d <sub>5/2</sub> | 487.64  | 1.04      | 19108.1         | 32.3         |
| Sn <sup>4+</sup> 3d <sub>5/2</sub> | 488.1   | 1.24      | 36967.78        | 63.5         |

**Fig. S1.** XPS spectra of Sn on Sn-graphite

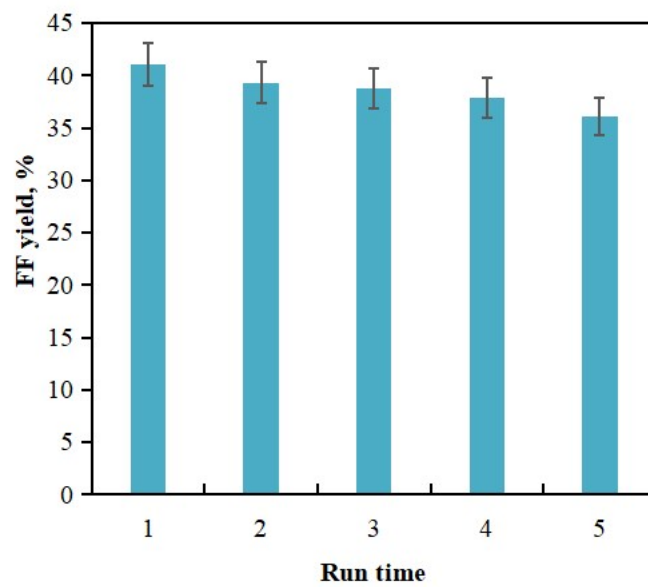

**Fig. S2.** Recovery and reuse of Sn-graphite for catalyzing BSS.

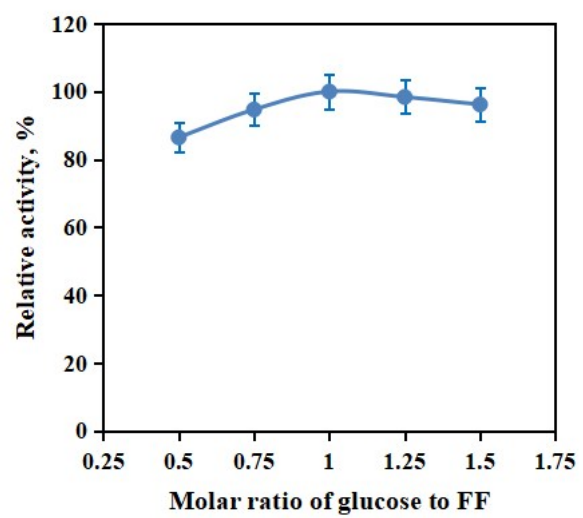

**Fig. S3.** Effects of cosubstrate glucose loading on FF-reducing activity of CCZU-A13 cells.

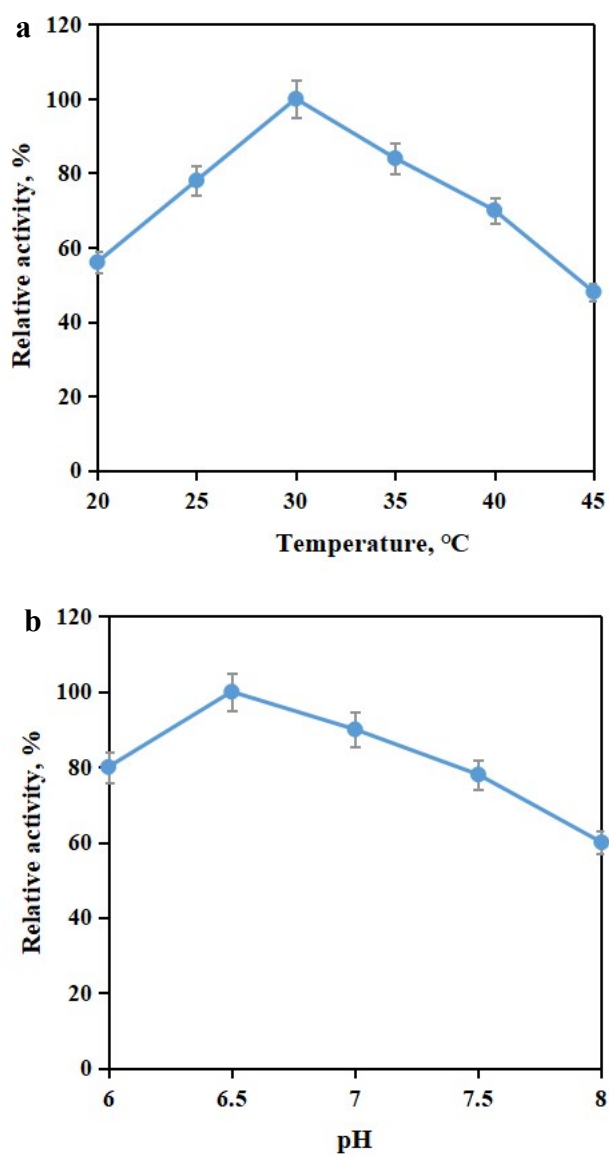

**Fig. S4.** Effects of various temperature on FF-reducing on activity of CCZU-A13 cells (a); Effects of various pH on FF-reducing catalytic activity of CCZU-A13 cells (b).

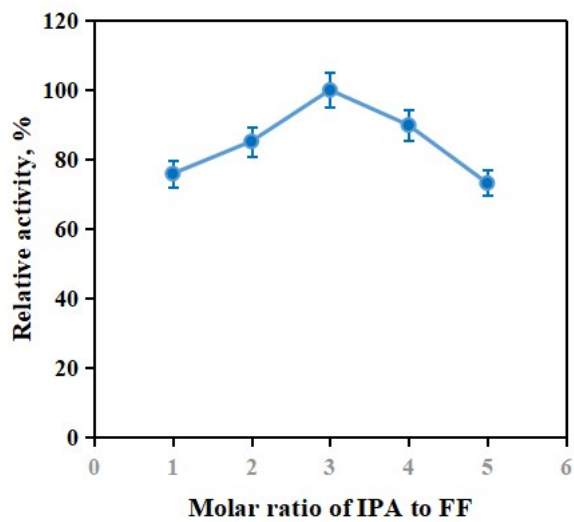

**Fig. S5.** Effects of amine donor IPA loading on the bioamination activity of AT2018 cells.

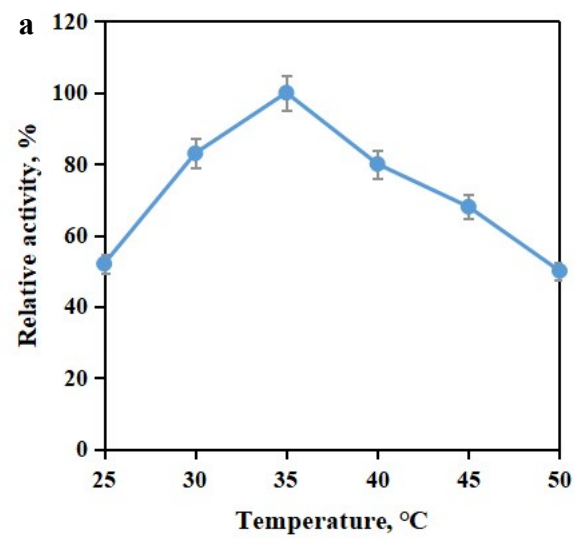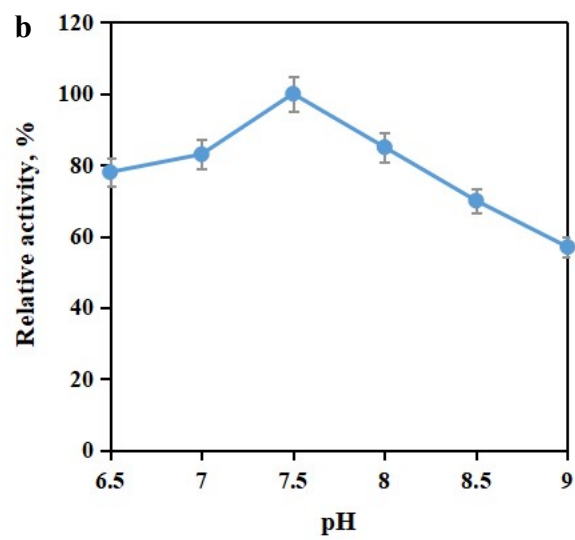

**Fig. S6.** Effects of various temperature on FF-amination activity of AT2018 cells (a); Effects of various pH on FF-amination activity of AT2018 cells (b).

**Table S1.** Changes of Sn content on Sn-graphite by element analysis before and after repeated use of Sn-graphite

| <b>Samples</b>                 | <b>Sn content, %</b> |
|--------------------------------|----------------------|
| Fresh graphite                 | -                    |
| Sn-graphite                    | 8.1                  |
| One-time recycled Sn-graphite  | 7.7                  |
| Five-time recycled Sn-graphite | 2.9                  |
